# Supplementary material
Source: publisher figshare collection journal article supplement (https://asha.figshare.com/ndownloader/files/34268897)
Supplement: Supplementary file 1 [file 34268897]

**Supplemental Material S1. Risk of bias assessment.**

| First Author and Year | Title                                                                                                                                                            | N   | Use of Randomization | Study Design             | Use of Validated Instrument | Received funding | Overall Bias Rating |
|-----------------------|------------------------------------------------------------------------------------------------------------------------------------------------------------------|-----|----------------------|--------------------------|-----------------------------|------------------|---------------------|
| Antin, F. 2021        | Rehabilitation following total laryngectomy: Oncologic, functional, socio-occupational and psychological aspects                                                 | 133 | No                   | Cross Sectional          | Yes                         | No               | Low                 |
| Blood, G. 1994        | Spouses of individuals with laryngeal cancer: caregiver strain and burden                                                                                        | 75  | No                   | Cross Sectional          | Yes                         | Yes              | Low                 |
| Cnossen, I. 2015      | A participatory design approach to develop a web-based self-care program supporting early rehabilitation among patients after total laryngectomy                 | 12  | No                   | Case Series              | N/A                         | Yes              | High                |
| Graboyes, E. 2017     | Association of perioperative education program with unplanned remission following total laryngectomy                                                             | 50  | No                   | Cohort                   | N/A                         | Yes              | Medium              |
| Gür, H. 2020          | The effect of partial and total laryngectomy on couples' sexual functions in med with larynx cancer                                                              | 78  | No                   | Cohort                   | Yes                         | No               | Low                 |
| Herranz, J. 1999      | Psychosocial adjustment after laryngeal surgery                                                                                                                  | 198 | No                   | Cross Sectional          | Yes                         | No               | Low                 |
| Kommers, M. 1979      | Wives' Evaluation of problems related to laryngectomy                                                                                                            | 45  | No                   | Cross Sectional          | No                          | No               | Medium              |
| Mathieso, C. 2007     | Psychology & Health: the impact of a laryngectomy on the spouse: who is better off?                                                                              | 60  | No                   | Qualitative/ Descriptive | No                          | Yes              | High                |
| Meyer, A. 2015        | Psychological distress and need for psycho-oncological support in spouses of total laryngectomized cancer patients - results for the first 3 years after surgery | 154 | No                   | Cross Sectional          | Yes                         | Yes              | Low                 |
| Offerman,             | Psychosocial consequences for partners                                                                                                                           | 295 | No                   | Cross                    | Yes                         | Yes              | Low                 |

|                |                                                                                                                                                                                    |     |    |                 |     |    |        |
|----------------|------------------------------------------------------------------------------------------------------------------------------------------------------------------------------------|-----|----|-----------------|-----|----|--------|
| M. 2015        | and patients after total laryngectomy and for the relationship between patients and partners                                                                                       |     |    | Sectional       |     |    |        |
| Spito, A. 2019 | A therapeutic education program for patients that underwent a temporary tracheostomy and total laryngectomy: leading to improve the "diagnostic, therapeutic, and assistance path" | 49  | No | Not a Study     | N/A | No | High   |
| Zeine, L. 2017 | Pre- and post-operative counseling for laryngectomees and their spouses: an update                                                                                                 | 153 | No | Cross Sectional | No  | No | Medium |
